# Supplementary material
Source: PubMed Central journal article supplement (PMC3613228)
Supplement: NIHMS443725-supplement-Supplemental_figures.pdf [file NIHMS443725-supplement-Supplemental_figures.pdf]

## Supplementary Materials for

### **Rapamycin Reverses Elevated mTORC1 Signaling in Lamin A/C– Deficient Mice, Rescues Cardiac and Skeletal Muscle Function, and Extends Survival**

Fresnida J. Ramos, Steven C. Chen, Michael G. Garelick, Dao-Fu Dai, Chen-Yu Liao, Katherine H. Schreiber, Vivian L. MacKay, Elroy H. An, Randy Strong, Warren C. Ladiges, Peter S. Rabinovitch, Matt Kaerberlein,\* Brian K. Kennedy\*

\*To whom correspondence should be addressed. E-mail: bkennedy@buckinstitute.org (B.K.K.);  
kaeber@uw.edu (M.K.)

Published 25 July 2012, *Sci. Transl. Med.* **4**, 144ra103 (2012)

DOI: 10.1126/scitranslmed.3003802

#### **The PDF file includes:**

- Fig. S1. Further characteristics of *Lmna*<sup>+/+</sup> and *Lmna*<sup>-/-</sup> mice.
- Fig. S2. Effect of rapamycin on survival of *Lmna*<sup>+/+</sup> and *Lmna*<sup>-/-</sup> male and female mice.
- Fig. S3. Effect of rapamycin at different dosing regimens on survival of *Lmna*<sup>+/+</sup> and *Lmna*<sup>-/-</sup> mice.
- Fig. S4. Effect of rapamycin on myofiber cross-sectional area in *Lmna*<sup>-/-</sup> mice.
- Fig. S5. Autophagosome formation in *Lmna*<sup>-/-</sup> mice.

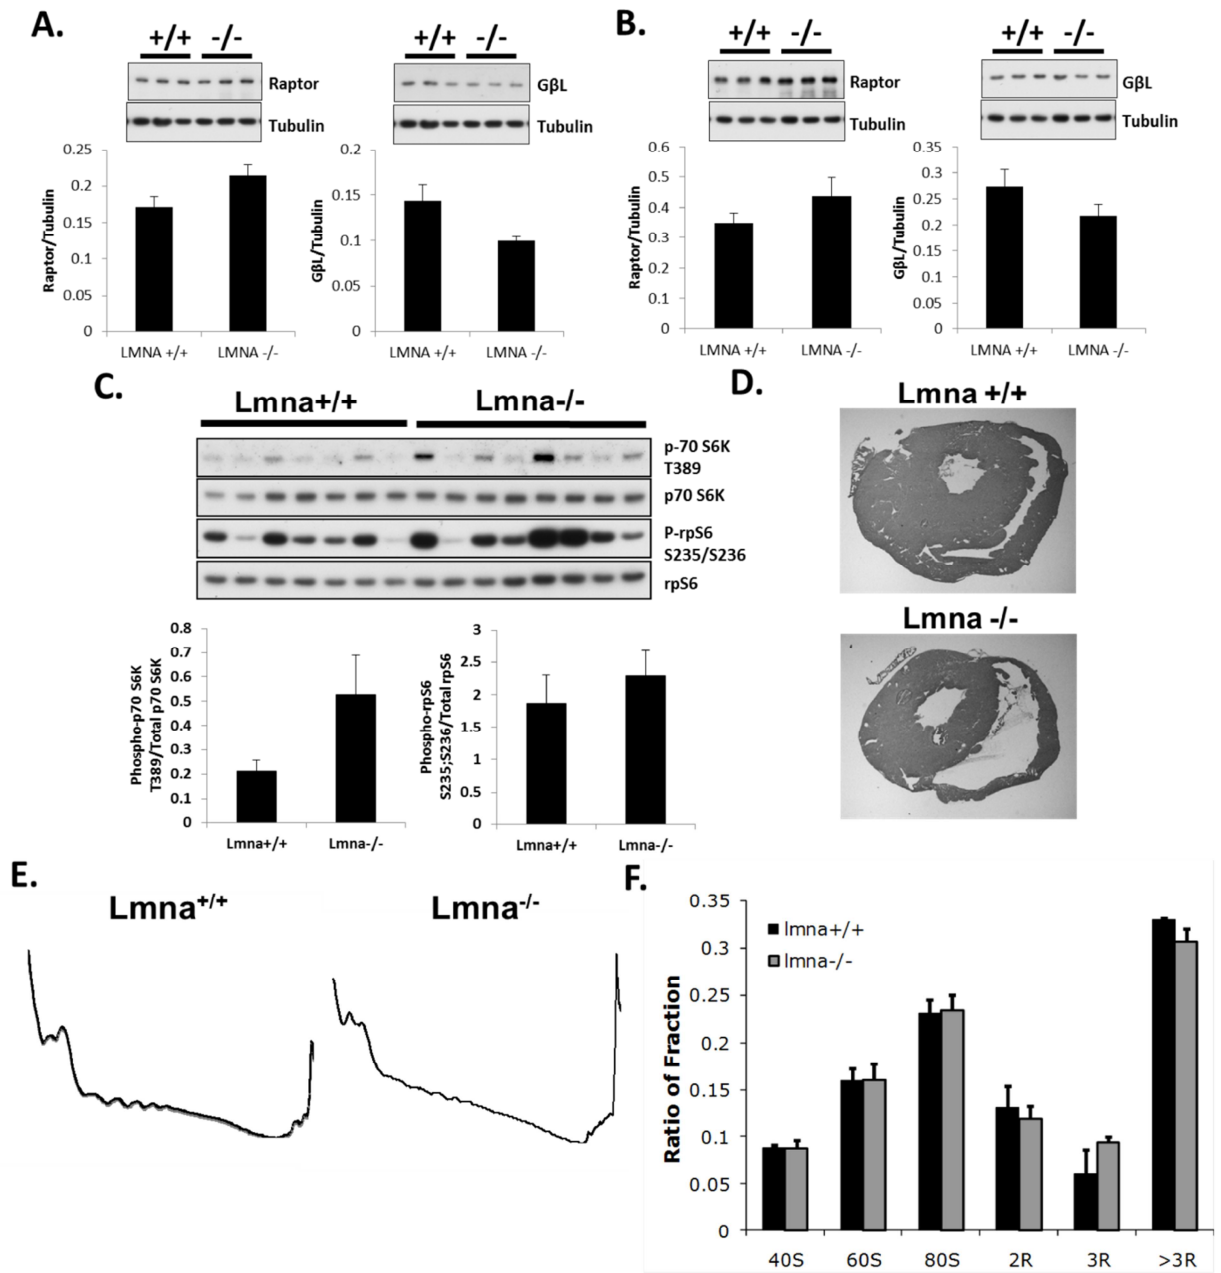

**Fig. S1. Further characteristics of  $Lmna^{+/+}$  and  $Lmna^{-/-}$  mice.** A) Raptor and GβL protein levels in heart, which are not significantly different in  $Lmna^{-/-}$  mice ( $n = 4$ ) compared to  $Lmna^{+/+}$  mice ( $n = 5$ ). B) Raptor and GβL protein levels in muscle, which are not significantly different in  $Lmna^{-/-}$  mice ( $n = 6$ ) compared to  $Lmna^{+/+}$  mice ( $n = 7$ ). C) Representative western blots and quantification of liver tissue lysates from  $Lmna^{+/+}$  ( $n = 7$ ) and  $Lmna^{-/-}$  ( $n = 8$ ) mice. Phosphorylated S6 kinase<sup>(T389)</sup> and rpS6<sup>(S235/S236)</sup> are not significantly different in  $Lmna^{-/-}$  mice compared to  $Lmna^{+/+}$  mice. D) Heart sections of  $Lmna^{+/+}$  and  $Lmna^{-/-}$  mice stained with

hematoxylin and eosin showing left and right ventricular dilatation in *Lmna*<sup>-/-</sup> mice. E) Representative polysome profiles of heart tissue from *Lmna*<sup>+/+</sup> (*n* = 3) and *Lmna*<sup>-/-</sup> (*n* = 3) mice. F) Polysome analysis of heart tissue from *Lmna*<sup>+/+</sup> and *Lmna*<sup>-/-</sup> mice showing that protein translation is not increased in *Lmna*<sup>-/-</sup> mice. Solid black bars, *Lmna*<sup>+/+</sup> mice; solid gray bars, *Lmna*<sup>-/-</sup> mice.

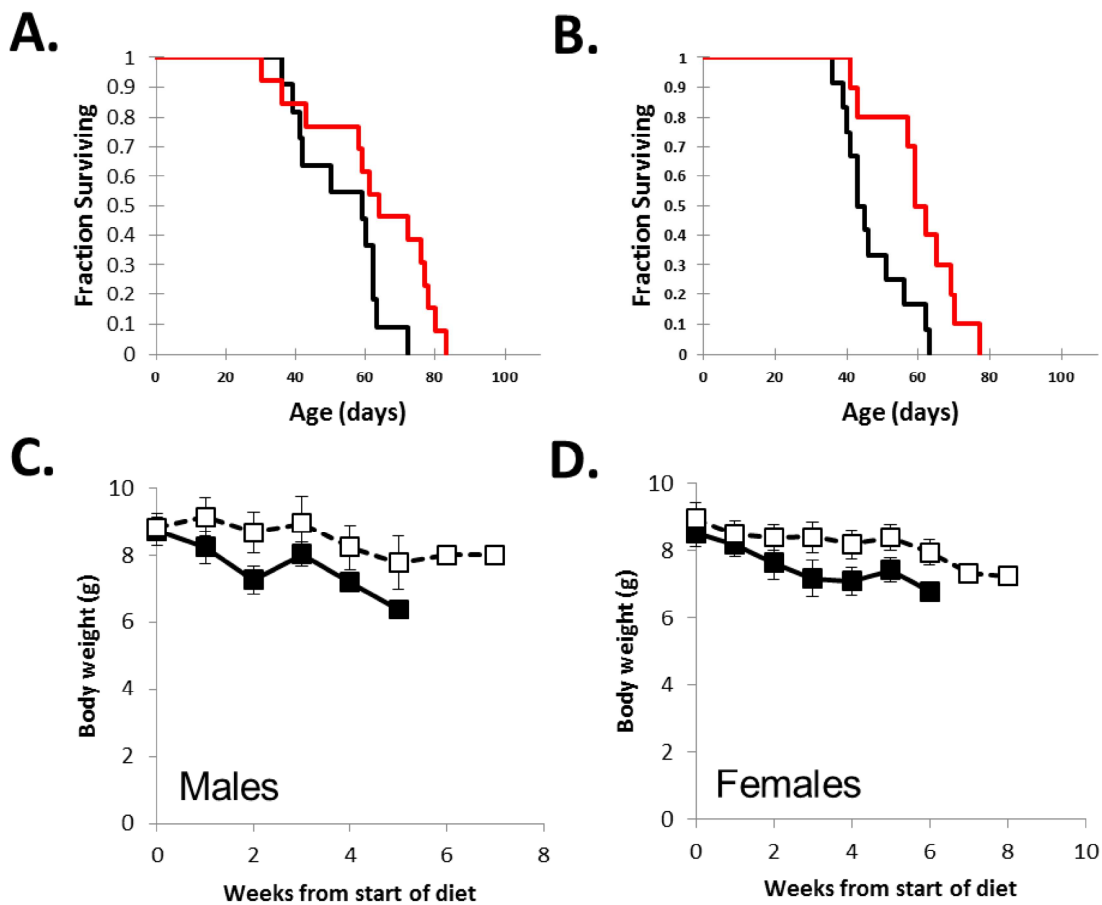

**Fig. S2. Effect of rapamycin on survival of *Lmna*<sup>+/+</sup> and *Lmna*<sup>-/-</sup> male and female mice.** A) Kaplan-Meier plot of male *Lmna*<sup>-/-</sup> mice fed control ( $n = 12$ ) (black) or rapamycin (red) diet ( $n = 10$ ). Survival was significantly increased in male *Lmna*<sup>-/-</sup> mice fed dietary rapamycin ( $P = 0.0068$ ). B) Kaplan-Meier plot of female *Lmna*<sup>-/-</sup> mice fed control ( $n = 11$ ) (black) or rapamycin (red) diet ( $n = 13$ ). Survival was significantly increased in female *Lmna*<sup>-/-</sup> mice fed dietary rapamycin ( $P = 0.036$ ). C) Body weight of male *Lmna*<sup>-/-</sup> mice fed rapamycin diet (dashed black line, open squares) was significantly different than control (solid black line, black squares) ( $P = 0.048$ ). D) Body weight curve of female *Lmna*<sup>-/-</sup> mice fed rapamycin diet (dashed black line, open squares) was significantly different than control (solid black line, black squares) ( $P = 0.0060$ ). Error bars are  $\pm$  SEM.

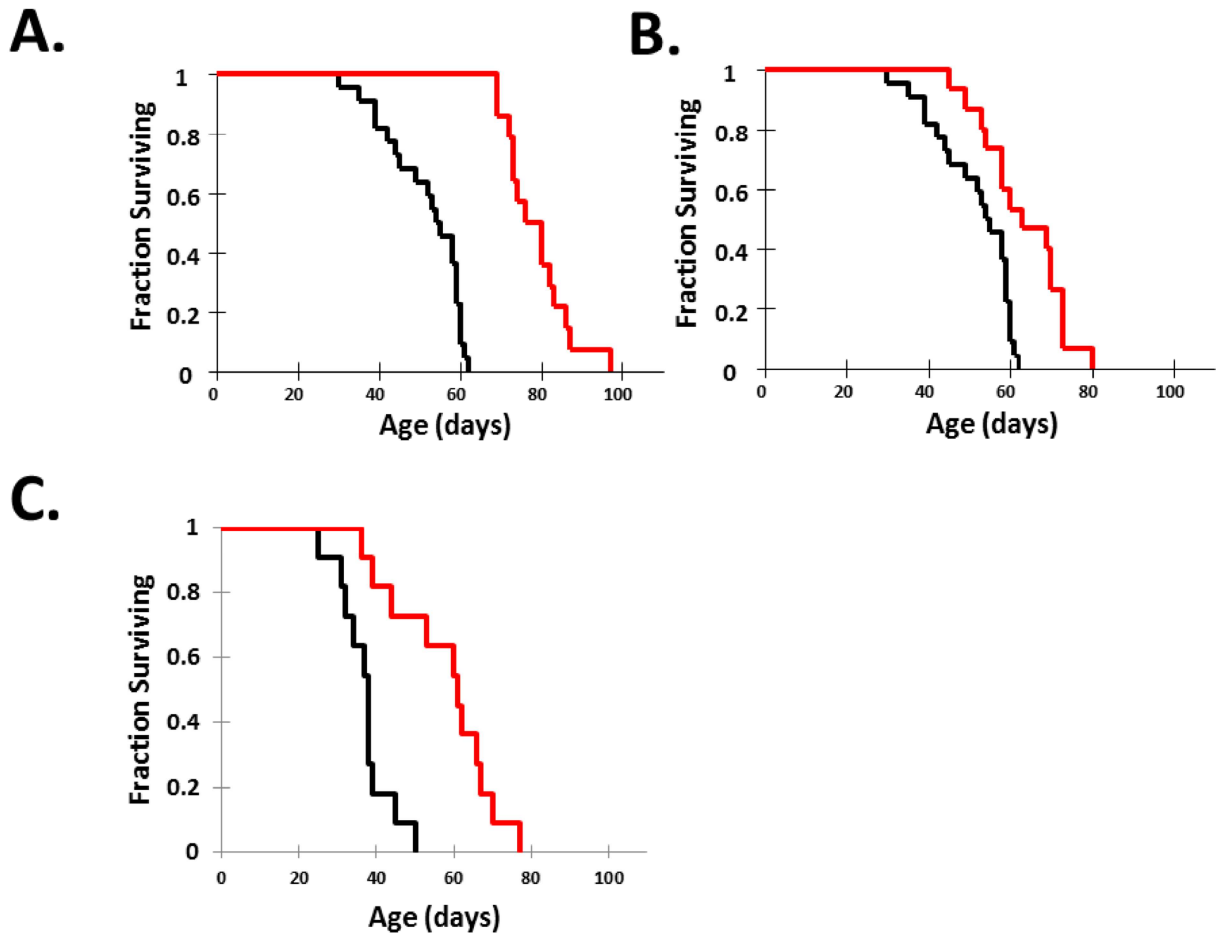

**Fig. S3. Effect of rapamycin at different dosing regimens on survival of  $Lmna^{+/+}$  and  $Lmna^{-/-}$  mice.** A) Kaplan-Meier plot of  $Lmna^{-/-}$  mice (mixed 129Sv-C57BL/6J genetic background) injected with vehicle ( $n = 11$ ) or 8 mg/kg rapamycin ( $n = 9$ ) once a week. Survival was significantly increased in male  $Lmna^{-/-}$  mice injected with rapamycin ( $P < 0.0001$ ). B) Kaplan-Meier plot of  $Lmna^{-/-}$  mice (mixed 129Sv-C57BL/6J genetic background) injected with vehicle ( $n = 11$ ) or 8mg/kg rapamycin ( $n = 12$ ) every other day for one week (3 injections total). Survival was significantly increased in  $Lmna^{-/-}$  mice injected with rapamycin ( $P = 0.025$ ). C) Kaplan-Meier plot of  $Lmna^{-/-}$  mice (C57BL/6J genetic background) injected with vehicle ( $n = 11$ ) or 8mg/kg rapamycin every other day ( $n = 11$ ). Survival was significantly increased in  $Lmna^{-/-}$  mice injected with rapamycin ( $P = 0.0002$ ). For all Kaplan-Meier plots, control=black and rapamycin=red.

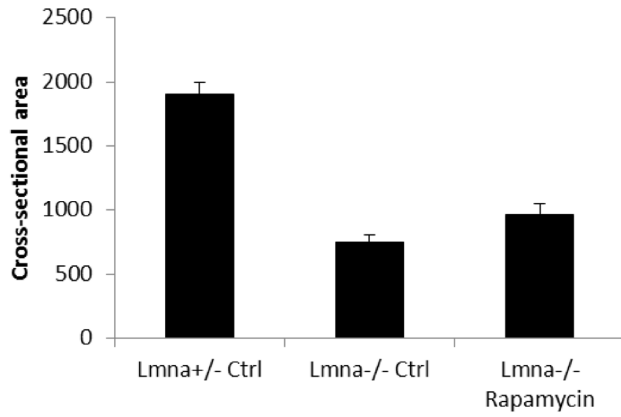

**Fig. S4. Effect of rapamycin on myofiber cross-sectional area in *Lmna*<sup>-/-</sup> mice.** The cross sectional area was not significantly different between the *Lmna*<sup>-/-</sup> and the rapamycin-treated *Lmna*<sup>-/-</sup> groups of mice ( $P = 0.071$ ).

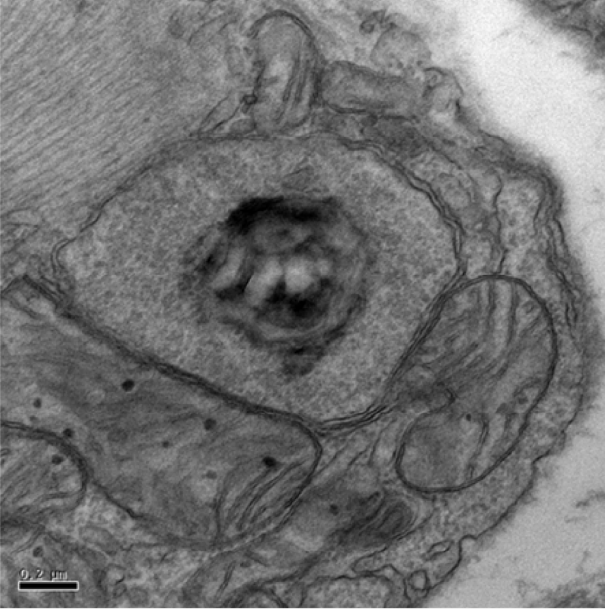

**Fig. S5. Autophagosome formation in *Lmna*<sup>-/-</sup> mice.** A representative electron micrographs from *Lmna*<sup>-/-</sup> heart sections displaying autophagosome formation.
